# Supplementary material for: Synthesis and highly enhanced acetylene sensing properties of Au nanoparticle-decorated hexagonal ZnO nanorings
Source: Royal Society of Chemistry journal article supplement (doi:10.1039/c5ra16552k), 2015-01-01
Supplement: c5ra16552k1.pdf [file c5ra16552k1.pdf]

## Supporting Information

### **Synthesis and highly enhanced acetylene sensing properties of Au nanoparticle-decorated hexagonal ZnO nanorings**

Chao Li,<sup>a, c</sup> Ying Lin,<sup>a, c</sup> Feng Li,<sup>a, c</sup> Linghui Zhu,<sup>a, c</sup> Fanxu Meng,<sup>\*b</sup> Dongming Sun,<sup>a</sup>  
Jingran Zhou,<sup>\*a</sup>, Shengping Ruan<sup>\*c</sup>

<sup>a</sup> State Key Laboratory on Integrated Optoelectronics, Jilin University, Changchun 130012, P. R. China.

E-mail: zhoujr@jlu.edu.cn (J. Zhou)

<sup>b</sup> Jilin Institute of Chemical Technology, Jilin City, 132022, PR China.

E-mail: E-mail: fxmengjlu@gmail.com (F. Meng)

<sup>c</sup> College of Electronic Science and Engineering, Jilin University, Changchun 130012, PR China.

E-mail: Ruansp@jlu.edu.cn (S. Ruan)

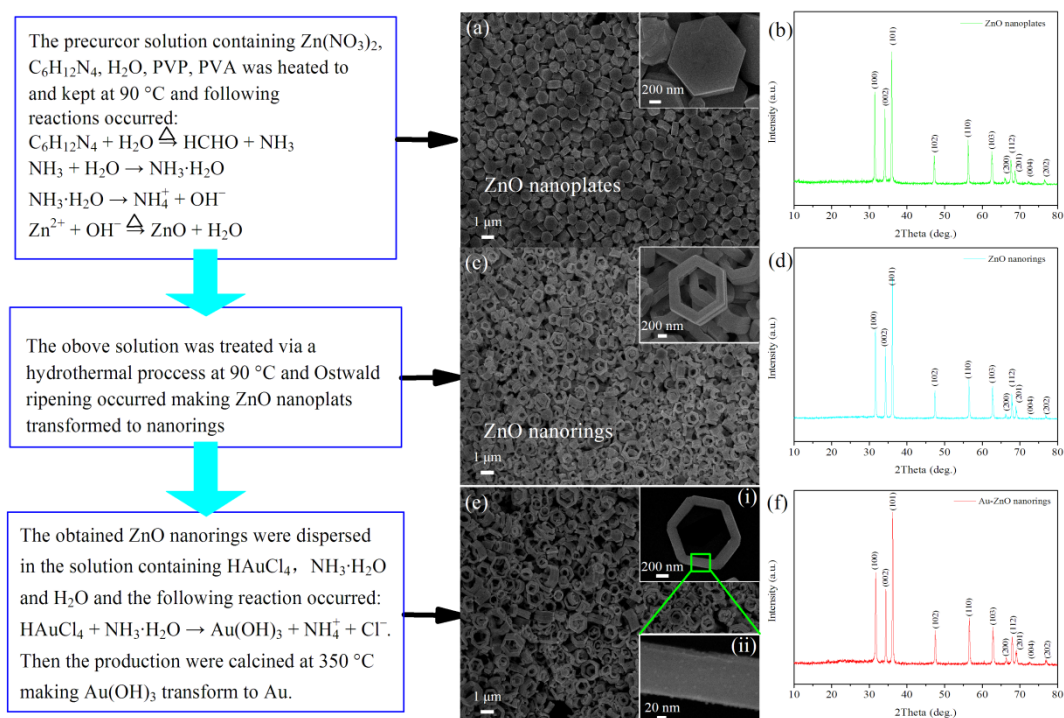

**Figure S1.** Synthesis process and formation mechanism of ZnO nanorings and Au-ZnO nanorings. (a) and (b) SEM images and XRD pattern of hexagonal ZnO nanoplates; (c) and (d) SEM images and XRD pattern of hexagonal ZnO nanorings; (e) and (f) SEM images and XRD pattern of Au nanoparticle-decorated hexagonal ZnO nanorings.

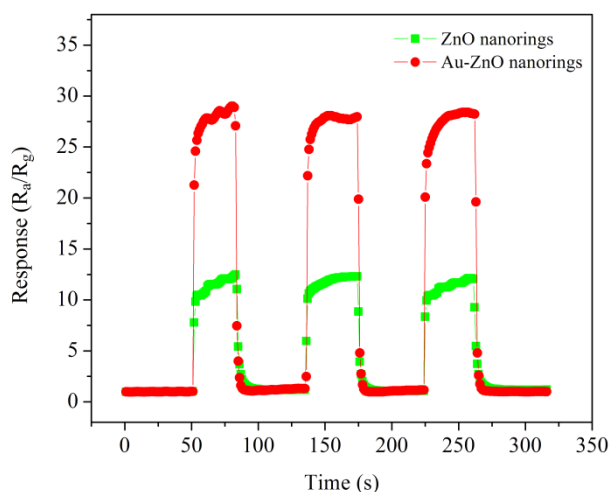

**Figure S2.** Repeatability of the ZnO and Au-ZnO nanorings to 100 ppm acetylene at their optimum operating temperature.

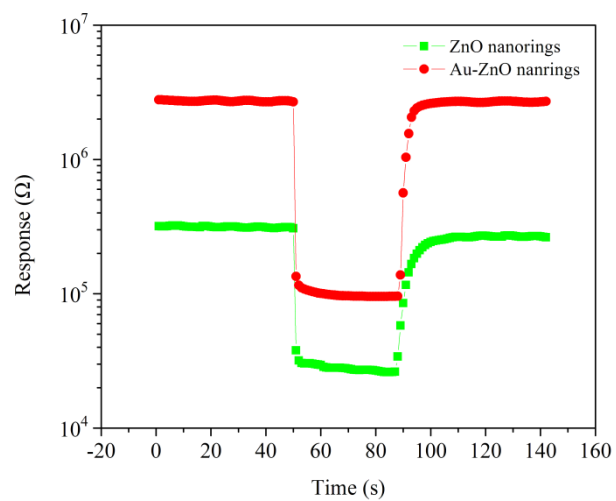

**Figure S3.** Transient resistance of ZnO and Au-ZnO nanorings to 100 ppm acetylene.
